# Supplementary material
Source: PubMed Central journal article supplement (PMC4472323)
Supplement: supp_dev110_dev110supp_table1.pdf [file supp_dev110_dev110supp_table1.pdf]

**Supplementary data Table S1** Characteristics of women with PCOS and control subjects in the Boston and Greek cohorts.

| Parameter                | Boston              |              |                         | Greek               |                           |              |                         |                         |
|--------------------------|---------------------|--------------|-------------------------|---------------------|---------------------------|--------------|-------------------------|-------------------------|
|                          | PCOS <sub>NIH</sub> | Control      | P-value                 | PCOS <sub>NIH</sub> | PCOS <sub>Rotterdam</sub> | Control      | P-value Ctl NIH         | P-value Ctl Rotterdam   |
| Age (years)              | 28.4 ± 7.0          | 28.9 ± 8.5   | 0.3                     | 24.0 ± 5.6          | 26.0 ± 5.6                | 31.0 ± 5.8   | 5.9 × 10 <sup>-23</sup> | 6.5 × 10 <sup>-8</sup>  |
| BMI (kg/m <sup>2</sup> ) | 30.8 ± 8.6          | 23.5 ± 3.8   | 1.7 × 10 <sup>-53</sup> | 26.7 ± 7.2          | 25.8 ± 5.4                | 28.5 ± 7.6   | 0.03                    | 0.01                    |
| Waist circumference (cm) | 96.1 ± 18.9         | 80.6 ± 10.6  | 2.5 × 10 <sup>-36</sup> | 83.6 ± 15.5         | 80.3 ± 11.9               | 87.2 ± 15.8  | 0.049                   | 0.002                   |
| Hip Circumference (cm)   | 108.8 ± 16.9        | 98.4 ± 9.5   | 5.6 × 10 <sup>-22</sup> | 106.1 ± 13.0        | 105.2 ± 10.1              | 109.8 ± 14.0 | 0.02                    | 0.02                    |
| WHR                      | 0.88 ± 0.08         | 0.82 ± 0.06  | 7.2 × 10 <sup>-29</sup> | 0.78 ± 0.08         | 0.76 ± 0.07               | 0.79 ± 0.07  | 0.5                     | 0.01                    |
| SBP (mmHg)               | 114.1 ± 15.8        | 109.5 ± 12.5 | 1.4 × 10 <sup>-6</sup>  |                     |                           |              |                         |                         |
| DBP (mmHg)               | 71.6 ± 12.2         | 70.0 ± 9.4   | 0.03                    |                     |                           |              |                         |                         |
| Pulse (beats per minute) | 74.7 ± 10.4         | 68.3 ± 9.4   | 8.3 × 10 <sup>-20</sup> |                     |                           |              |                         |                         |
| Testosterone (ng/dl)     | 64.0 ± 33.5         | 35.7 ± 17.2  | 3.8 × 10 <sup>-33</sup> | 78.7 ± 29.2         | 77.8 ± 28.6               | 39.7 ± 11.2  | 1.0 × 10 <sup>-38</sup> | 2.8 × 10 <sup>-25</sup> |
| SHBG (nmol/l)            | 41.2 ± 22.1         | 65.8 ± 31.0  | 1.5 × 10 <sup>-24</sup> | 42.2 ± 26.1         | 46.0 ± 25.5               | 54.6 ± 30.8  | 1.4 × 10 <sup>-5</sup>  | 0.02                    |
| Androstenedione (ng/ml)  | 3.6 ± 1.3           | 3.1 ± 1.5    | 0.0001                  | 2.8 ± 1.1           | 2.9 ± 1.1                 | 1.7 ± 0.5    | 5.8 × 10 <sup>-26</sup> | 8.4 × 10 <sup>-20</sup> |
| DHEAS (µg/dl)            | 197 ± 103           | 210 ± 107    | 0.2                     | 312 ± 132           | 328 ± 139                 | 200 ± 81     | 1.1 × 10 <sup>-14</sup> | 3.9 × 10 <sup>-12</sup> |
| LH (IU/l)                | 26.9 ± 16.7         | 14.9 ± 12.8  | 6.9 × 10 <sup>-21</sup> | 8.0 ± 5.2           | 6.5 ± 4.4                 | 5.4 ± 2.5    | 7.7 × 10 <sup>-6</sup>  | 0.07                    |
| FSH (IU/l)               | 10.5 ± 2.9          | 10.6 ± 3.6   | 0.8                     | 5.9 ± 1.7           | 6.6 ± 1.8                 | 6.8 ± 2.4    | 0.8                     | 0.8                     |
| LH:FSH                   | 2.6 ± 1.4           | 1.4 ± 0.9    | 1.1 × 10 <sup>-26</sup> | 1.4 ± 0.9           | 1.0 ± 0.6                 | 1.0 ± 1.6    | 0.0009                  | 0.8                     |
| FG score                 | 12.6 ± 7.6          | 4.1 ± 2.3    | 3.3 × 10 <sup>-72</sup> |                     |                           |              |                         |                         |
| HbA1C (%)                | 5.3 ± 0.3           | 5.2 ± 0.3    | 0.0006                  |                     |                           |              |                         |                         |
| Fasting glucose (mg/dl)  | 84.9 ± 9.4          | 80.9 ± 7.3   | 5.1 × 10 <sup>-10</sup> | 98.0 ± 16.3         | 96.6 ± 11.0               | 100.5 ± 10.1 | 0.1                     | 0.04                    |
| Glucose 120 min (mg/dl)  | 99.9 ± 28.6         | 85.2 ± 21.9  | 4.3 × 10 <sup>-13</sup> | 112.8 ± 32.5        | 109.0 ± 26.8              | 107.7 ± 32.2 | 0.16                    | 0.54                    |
| Fasting insulin (µIU/ml) | 10.6 ± 10.3         | 5.2 ± 3.7    | 2.5 × 10 <sup>-18</sup> | 12.4 ± 11.3         | 10.0 ± 6.4                | 12.3 ± 15.1  | 0.56                    | 0.30                    |
| Insulin 120 min (µIU/ml) | 60.1 ± 62.4         | 25.4 ± 17.5  | 2.0 × 10 <sup>-20</sup> |                     |                           |              |                         |                         |
| HOMA-IR                  | 2.3 ± 2.4           | 1.0 ± 0.7    | 1.6 × 10 <sup>-18</sup> |                     |                           |              |                         |                         |
| Glucose/insulin          | 14.4 ± 10.5         | 20.0 ± 9.8   | 9.8 × 10 <sup>-13</sup> | 11.8 ± 7.5          | 12.9 ± 11.0               | 11.8 ± 7.5   | 0.36                    | 0.50                    |
| Cholesterol (mg/dl)      | 183.4 ± 35.3        | 173.9 ± 32.9 | 0.0004                  |                     |                           |              |                         |                         |
| Triglycerides (mg/dl)    | 100.6 ± 63.5        | 67.1 ± 27.4  | 1.4 × 10 <sup>-17</sup> |                     |                           |              |                         |                         |
| HDL (mg/dl)              | 52.8 ± 16.3         | 61.5 ± 14.2  | 7.4 × 10 <sup>-13</sup> |                     |                           |              |                         |                         |
| LDL (mg/dl)              | 111.6 ± 32.3        | 96.1 ± 28.4  | 1.4 × 10 <sup>-10</sup> |                     |                           |              |                         |                         |
| Ovarian volume (ml)      | 15.0 ± 8.0          | 9.2 ± 4.0    | 1.7 × 10 <sup>-25</sup> | 9.1 ± 4.3           | 10.0 ± 5.1                | 6.2 ± 1.9    | 8.5 × 10 <sup>-9</sup>  | 2.6 × 10 <sup>-11</sup> |
| Follicle number          | 13.5 ± 3.8          | 9.4 ± 3.3    | 5.4 × 10 <sup>-44</sup> | 11.8 ± 5.5          | 13.0 ± 4.0                | 7.6 ± 2.0    | 7.0 × 10 <sup>-13</sup> | 2.7 × 10 <sup>-22</sup> |

The data for the Greek cohort are separated into PCOS by the NIH criteria ( $n = 783$ ), PCOS by the Rotterdam criteria (hyperandrogenism and polycystic ovary morphology ( $n = 101$ )) and controls.
