# Supplementary material
Source: PubMed Central journal article supplement (PMC4472323)
Supplement: supp_dev110_dev110supp_table2.pdf [file supp_dev110_dev110supp_table2.pdf]

**Supplementary data Table SII PCOS risk variants in Greek women with PCOS and controls.**

| <b>Variant</b> | <b>Chr</b> | <b>Nearest Gene</b> | <b>OR (95% CI)</b> | <b>P-value</b> | <b>OR<sub>NIH</sub> (95% CI)</b> | <b>P-value<sub>NIH</sub></b> |
|----------------|------------|---------------------|--------------------|----------------|----------------------------------|------------------------------|
| rs13405728     | 2p16.3     | <i>LHCGR</i>        | 1.23 (0.79–1.91)   | 0.35           | 1.20 (0.76–1.87)                 | 0.43                         |
| rs13429458     | 2p21       | <i>THADA</i>        | 1.09 (0.83–1.43)   | 0.54           | 1.09 (0.83–1.44)                 | 0.55                         |
| rs12478601     | 2p21       | <i>THADA</i>        | 0.84 (0.70–1.01)   | 0.06           | 0.82 (0.68–0.99)                 | 0.04                         |
| rs10986105     | 9q33.3     | <i>DENND1A</i>      | 1.99 (1.21–3.27)   | 0.006          | 1.87 (1.13–3.11)                 | 0.01                         |

Variants were previously replicated in women from Boston and Iceland (Welt et al., 2012). The OR and P-value from the whole group and the Greek subset diagnosed according to the NIH criteria (OR<sub>NIH</sub> and P-value<sub>NIH</sub>) are indicated.
